# Supplementary material for: Complete genome sequencing and comparison of two nitrogen-metabolizing bacteria isolated from Antarctic deep-sea sediment
Source: PubMed Central journal article supplement (PMC9580203; doi:10.1186/s12864-022-08942-6), 2022-10-19

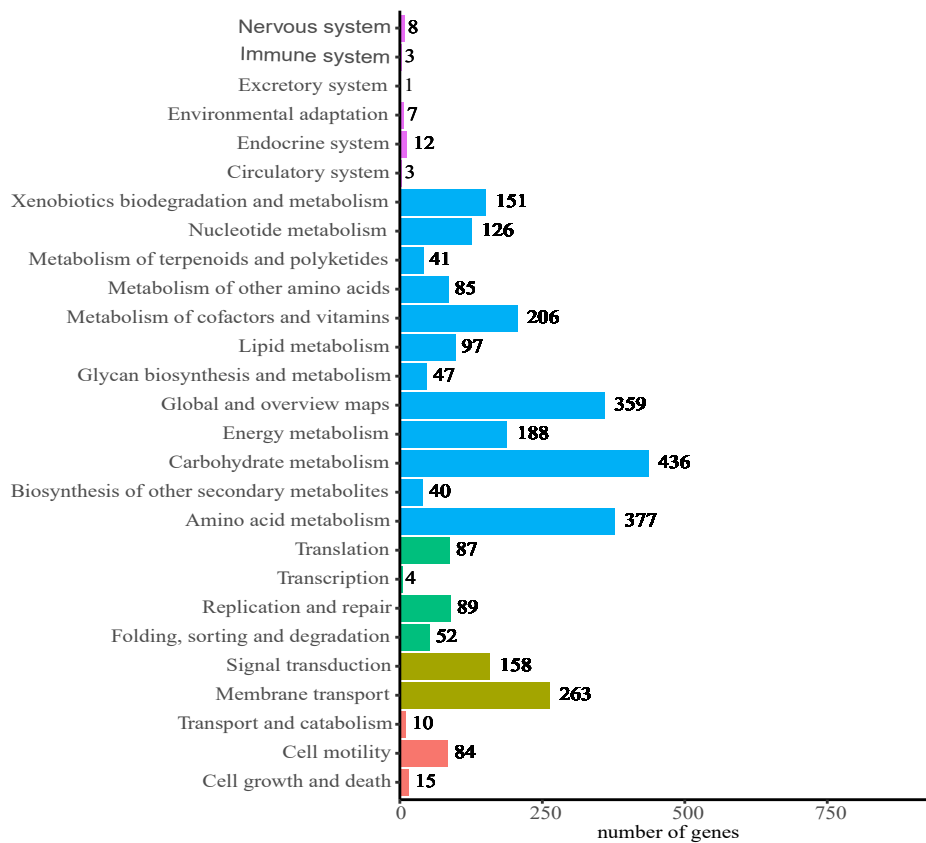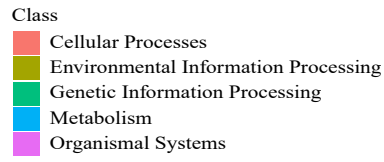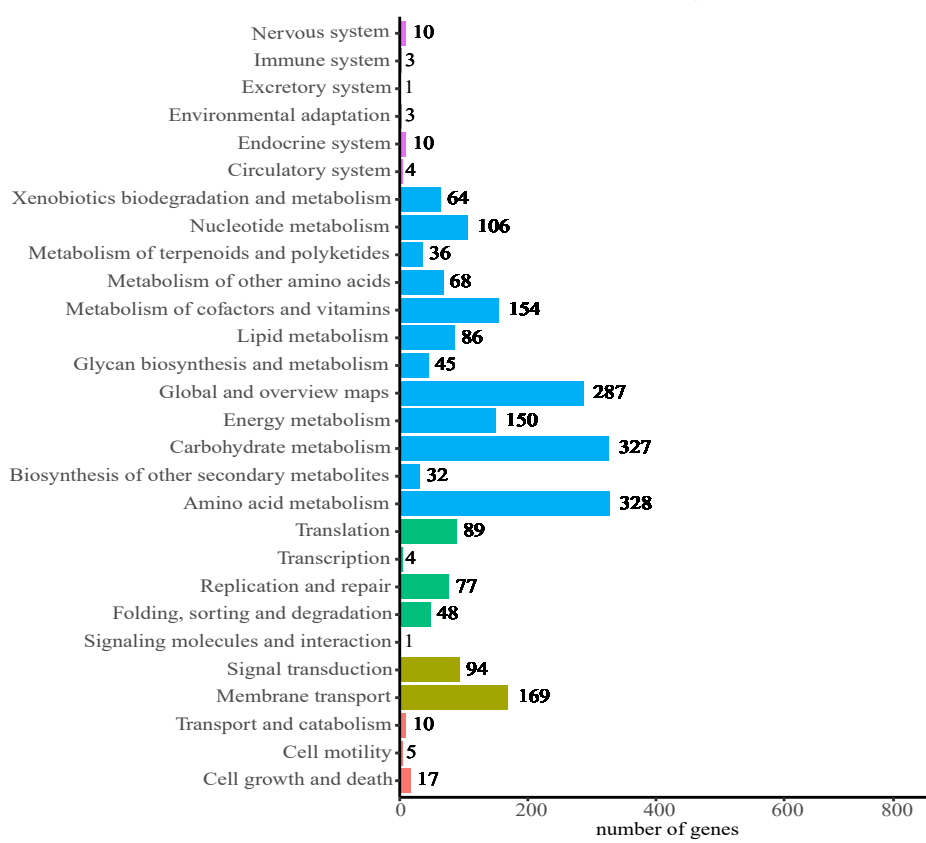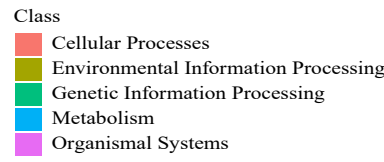

Supplement: 12864_2022_8942_MOESM5_ESM.pdf [file 12864_2022_8942_MOESM5_ESM.pdf]
