# Supplementary material for: Complete genome sequencing and comparison of two nitrogen-metabolizing bacteria isolated from Antarctic deep-sea sediment
Source: PubMed Central journal article supplement (PMC9580203; doi:10.1186/s12864-022-08942-6), 2022-10-19
Supplement: 12864_2022_8942_MOESM6_ESM.pdf [file 12864_2022_8942_MOESM6_ESM.pdf]

acsA

|                          |                                                                                            |     |
|--------------------------|--------------------------------------------------------------------------------------------|-----|
| HpacsA                   | -----MTATSSQLPDPYHYLDNFSVORVLR--LDDHRDGL---LNAPFACGGRHVRAGCDVIAL                           | 56  |
| CaacsA                   | MTPSDTTTNRTRSRAAASANSASHAMQPAASQTHSDYLAASFDIQAQRDFPTTPTNDESE--LGNAYFAPVGRHLRAGCGERIAL      | 84  |
| CcacsA (WP_144726521.1)  | MTTRDDTTTNRTRSRAANVTSA'DAT'FEP'PTHSQLQELGASFDIDA'RSEPLASGSESEPEPERPTGNAYFAPVGRHLRAGCGERIAL | 86  |
| HkacsA (WP_181514112.1)  | -----MSTQSLQELGASFMERFSIDEVLR--LDDHADCK---LNAPFACGGRHLRAGCGEPAL                            | 54  |
| HvacsaA (WP_106230398.1) | -----MST--LPDQSYLETFSIDDEVLR--LDDHRDCK---ANAFESSCGRHLRAGCDVIAL                             | 52  |
|                          |                                                                                            |     |
| HpacsA                   | VQEDSQGDMLHLSYALIEEISAKLAGWFKSGLGIQDRITACMLRSPQLLVAVATWRIGAVYQPLFTAFGEDAVYRLGRAPTRL        | 142 |
| CaacsA                   | VHEDQCGVRSPLSYALIEEISARMDAALKAGVGMQRVACMLSRTPELMIALAATWRIGAVYQPLFTAFGDALYRLSRAPTQIL        | 170 |
| CcacsA (WP_144726521.1)  | VHEDQCGVRSMSYALIEDISARMDALALAGVGFQDRITACMLSRTEPELLVALAATWRIGAVYQPLFTAFGEDALYRLSRAPTQIL     | 172 |
| HkacsA (WP_181514112.1)  | VHEDQCGHRSPLSYALIEEISAKLAGWFAERGLGVQDRITACMLRSPQLLVAVATWRIGAVYQPLFTAFGEDAVYRLGRAPTRL       | 140 |
| HvacsaA (WP_106230398.1) | VHEDQCGQNTLTSYALIEASARLAGWFAERGLGVQDRITACMLRSPQLLVAVATWRIGAVYQPLFTAFGEDAVYRLGRAPTRL        | 138 |
|                          |                                                                                            |     |
| HpacsA                   | VITDHANRKKFDGTSOCPEVTLAVGSA-TSEHADDLDWQAALHTHTSMDKPRRAFPAFLQMFTSGTVGKPKGVAVELAGWBAFAL      | 227 |
| CaacsA                   | VITETSQRKFTEDARHFVITCVREGGDALEADLDWQTLQOSETEFEVMPAPAPFLQMFTSGTVGKPKGVAVANALBAFAM           | 256 |
| CcacsA (WP_144726521.1)  | VITETQRKFTEDERHPSLTCVRRRDESLDQGLDWQVLMQSEFVQFVPLSSDAPFLQMFTSGTVGKPKGVAVANALBAFAM           | 258 |
| HkacsA (WP_181514112.1)  | VITDHDNRKKFDGTSOCPEVTLAVGCEP-SEGHDLDWSEARSHSSEANPRRSPRPLFLQMFTSGTVGKPKGVAVELAGWBAFAL       | 225 |
| HvacsaA (WP_106230398.1) | VITDHANRKKFDGTSOCPEVTLAVGCEP-DADHADLDWNNVAHAHLETTTPRRSRPEFLQMFTSGTVGKPKGVAVELAAWBAFAL      | 223 |
|                          |                                                                                            |     |
| HpacsA                   | YMLELAIDLDDDRFWNMADPGWAYGLYYAIGPILLGVYTFCEKGFSAEGCALAFMKRRHTNFNFAAAPTAYRMLKASGLFDDAHEK     | 313 |
| CaacsA                   | YQRLAVLDLRFGERFWNMADPGWAYGLYYAIGPILLGATTFYMGKFFSAEGGLAFMRHRINDNFNFAAAPTAYRMLKASGLGEGAFER   | 342 |
| CcacsA (WP_144726521.1)  | YQRLAIDLRLPDRFWNMADPGWAYGLYYAIGPILLGATTFYMGKFFTAEGGLAFMRHRINDNFNFAAAPTAYRMLKASGCEGAFER     | 344 |
| HkacsA (WP_181514112.1)  | YMLELAIDLRESDRFWNMADPGWAYGLYYAIGPILLGVYTFCEKGFSAEGCALAFMRHRHTNFNFAAAPTAYRMLKASGLFDDAHEK    | 311 |
| HvacsaA (WP_106230398.1) | YMLELAVDLRDLDRFWNMADPGWAYGLYYAIGPILLGVYTFCEKGFSAEGCALAFMKRRHTNFNFAAAPTAYRMLKASGLFDDAHEK    | 309 |
|                          |                                                                                            |     |
| HpacsA                   | LELRVASSAGEPLNTEVWVWVRSLGCEVMDHYQOTETGMTCNNHHALEBPKKVGAMCVMPMPGYRLAILDREYNELPFGEPGVLA      | 399 |
| CaacsA                   | LELRVASSAGEPLNTEVWVWVRELGCEVMDHYQOTETGMTCNNHHALEBHVVVGVGCEPLPGYRLAVLDRREYRELPGEPGVLA       | 428 |
| CcacsA (WP_144726521.1)  | LELRVASSAGEPLNTEVWVWVRELGCEVMDHYQOTETGMTCNNHHALEBHVIVGVGCEPLPGYRLAVLDRREYRELPGEPGVLA       | 430 |
| HkacsA (WP_181514112.1)  | LELRVASSAGEPLNTEVWVWVRSLGCEVMDHYQOTETGMTCNNHHALEBPKKVGAMCVMPMPGYRLAILDREYNELPFGEPGVLA      | 397 |
| HvacsaA (WP_106230398.1) | LELRVASSAGEPLNTEVWVWVRSLGCEVMDHYQOTETGMTCNNHHALEBPKKVGAMCVMPMPGYRLAILDREYNELPFGEPGVLA      | 395 |
|                          |                                                                                            |     |
| HpacsA                   | DIKNSPAHFPGYTWQERKFFPAGYYLTGDVVIRNEDGCECFAGRDDDDIITTAGYRVGFADVENSVMLHPVAESAAVGQPDFIRG      | 485 |
| CaacsA                   | DIARSPAHFPGYTWQERKCFVAGYYLTGDVVVAEPDGRFFAGRDDDDIITTAGYRVGFADVENAVLHPVAESAAVGKPDFALRG       | 514 |
| CcacsA (WP_144726521.1)  | DIARSPAHFPGYTWQERKCFVAGYYLTGDVVVAEPDGRFFAGRDDDDIITTAGYRVGFADVENAVLHPVAESAAVGKPDFALRG       | 516 |
| HkacsA (WP_181514112.1)  | DIERSPAHFPGYTWQERKFFPAGYYLTGDVVIRNEDGCECFAGRDDDDIITTAGYRVGFADVENAVLHPVAESAAVGQPDFIRG       | 483 |
| HvacsaA (WP_106230398.1) | DIENSPAHFPGYTWQERKFFPAGYYLTGDVVIRNEDGCECFAGRDDDDIITTAGYRVGFADVENSVMLHPVAESAAVGQPDFIRG      | 481 |
|                          |                                                                                            |     |
| HpacsA                   | EVIKSYVILRFGCYEASDALAEIRKQVRERLSHAFPRVIEFVIELPKTPSGKIQRFKLRADAVDEEAKASQ--                  | 556 |
| CaacsA                   | EIKRNVVILRFGCHVGSDELAEBIRASVQRORLSAHSYPRIEFVDSLPKTPSGKIQRFKLRADARAS-----                   | 580 |
| CcacsA (WP_144726521.1)  | EIKRNVVILRFGCHVGSDELAEBIRQSVQRORLSAHSYPRIEFVDSLPKTPSGKIQRFKLRADARED-----                   | 582 |
| HkacsA (WP_181514112.1)  | EIKRNVVILRFGCHVGSDELAEBIRQSVQRORLSHAFPRVIEFVDTLPKTPSGKIQRFKLRADAAEKATGAAQ                  | 556 |
| HvacsaA (WP_106230398.1) | EIKRNVVILRFGCYEASDALAEIRKQVRERLSHAFPRVIEFVIELPKTPSGKIQRFKLRADAVDWKAEAPAK                   | 554 |

## fdhA

HpfdhA MN-ANRNGVYKGFGEVAVESIAYPELALGN-----RKCDHGVLKVVVTNICGSDQHMVRGRTTAPSGVLVGH EITGVVVE C 77  
 CafdhA MSANANRNGVYQCAKRVSVESLDYPTLALGN-----RKCDHGVLKVVVSTNICGSDQHMVRGRTTAPSGVLVGH EITGVVVE A 78  
 PafdhA (ABG39378.1) MNKTSNRNGVYKGFGEVAVESIAYPELALGN-----RKCDHGVLVIVVTNICGSDQHMVRGRTTAPSGVLVGH EITGVVVE V 78  
 NkfdhA (WP\_017574614.1) --MPGNRNGVYQCGFGEVDVTDIAYPEFELKPGPGVHPDNVCRKVPFHGVILEVVVATNICGSDQHMVRGRTTAPSGVLVGH EITGVVVE T 86  
 SsfhdA (WP\_020606316.1) --MCHNRNGVYQISGIVVEVETIYPKLALGE-----RKCDHGVILOIVSTNICGSDQHMVRGRTTAPSGVLVGH EITGVVVE A 76

HpfdhA GRDVEFIKFGDGLVSVFPFNIA CGGRCRNCKEGRGTGICLNVNPARPGEAYGYVDMGGWVGGQTEYVMVPYADFNLLFPDADQAMEKIKDL 165  
 CafdhA GRDVEFIKVGDIVSVFPFNIA CGGRCRNCKEGRGTGICLNVNPARPGEAYGYVDMGGWVGGQTDYVMVPYADFNLLFPDADQAMEKIRDL 166  
 PafdhA (ABG39378.1) GRDVEFIKFGDGLVSVFPFNIA CGGRCRNCKEGRGTGICLNVNPARPGEAYGYVDMGGWVGGQTEYVMVPYADFNLLFPDPEQAMEKIQDL 166  
 NkfdhA (WP\_017574614.1) GFDVEFVQEGDGLVSVFPFNIS CGGRCRNCKARTEICLNVNPARPGEAYGYVDMGGWVGGQAYALVPYADWNLLFPDRQAMDKIMDL 174  
 SsfhdA (WP\_020606316.1) GRDVEFIKFGDGLVSVFPFNIA CGGRCRNCKVCGTGICLNVNPARPGEAYGYVDMGGWVGGQAYVMVPYADFNLLFPDKDQAMAKIRDL 164

HpfdhA TLLSDIFPTGFHGCVVTAGVCGSGSVYIAGAGPVGLAAAVSAQLLGAACVIVGDMVERLQAARSFGCETIDLQDGEDMADKIEVILGE 253  
 CafdhA TLLSDIFPTGFHGCVVTAGVCGSGSVYIAGAGPVGLAAAVSAQLLGAACVIVGDMVERLQAARSFGCETIDLROESMSMEKVEVILGE 254  
 PafdhA (ABG39378.1) TLLSDIFPTGFHGCVVTAGVCGSGSVYIAGAGPVGLAAAVSAQLLGAACVIVGDMVERLQAARSFGCETIDLQDGEDMADKIEVILGE 254  
 NkfdhA (WP\_017574614.1) TMLSDIFPTGYHGCVVTAGVCGSGSVYIAGAGPVGLAAAVSAQLLGAACVIVGDLKEORLQAARVFGCETVNVSECDPAPLVEGVILGT 261  
 SsfhdA (WP\_020606316.1) TLLSDIFPTGYHCAVVTAGVCGSGSVYVAGAGPVGLAAAVSASCHLLGAACVIVGDMVERLQAARSFGCETVDLTKDPTLADQIADIIIV 252

HpfdhA REVDADFVDCVGFEAHAGCCNHGREAPATVNLNSAMSLTRAGGQIGIPGLYVTDPGAADDAKQCALSMRFGLWAKSHSEHTGQCPVM 341  
 CafdhA REVDCEVDVCGFEAHGGCCDHGREAPATVNLNSAMALTRAGGQIGIPGLYVTDPGAEDDAKQCALSMRFGLWAKSHSLHTGQCPVM 342  
 PafdhA (ABG39378.1) REVDADFVDCVGFEAHAGCHNHGREAPATVNLNSAMKMTRAGGQIGIPGLYVTDPGAADDAKQCALSMRFGLWAKSHSEHTGQCPVM 342  
 NkfdhA (WP\_017574614.1) REVDASVDVAVGFEAHYGTGEEAGSEAPASVNLNADMDVTRAGGQIGIPGLYVTDPGASDDPAKQEGSLIRSGLWGSKSHAFTGQCPAM 349  
 SsfhdA (WP\_020606316.1) PEVDSAVDVCVGFEAHGHGSGSSEKREAPATVNLNAAITVTRAGGQIGIPGLYVTDPGAATEDPAKQGNLSIRFGLWGAKSHSEHTGQCPVM 340

HpfdhA KYHRP LMQAILFGKVNITADAVNVQMIITLDQAFQGYADFDGGAAKKFVIDPHGSVA----- 396  
 CafdhA KYHRP LMQAILFGRVNITADAVNVQVIVSLEEARQGYADFDGGAAKKFVIDP HAMVRNGRAA 402  
 PafdhA (ABG39378.1) KYHRA LMQSILFGKVKIATAKAVNVKIVISLDDAEKGYADFDGGAAMKFVIDPHGNAA----- 397  
 NkfdhA (WP\_017574614.1) KYHRE LMMAILLHKVHTADAVNAVALPLEEARQGYQDFDRGAAKKFVLDPNQYLTGTG--- 406  
 SsfhdA (WP\_020606316.1) KYHRL MNNAILYDKVQIATAKAVNVQVIVSILDKAKKGYQDFDKGAAKKFVIDPHCLIPN--- 396

Hpicd **MTKTPKIIYTLTDEAPALATHSLLPIIDAFTD** **SAGIV**EVETRDISLAA **RIITAC**FPFVYLS **EECRIGD**HLAELG **ELT**TKTPEANI **IKLPNISA** 89  
Alicd (WP\_148254375.1) **MSKTPKIIYTLTDEAPALATHSLLPIIDAFTD** **SAGIV**EVETRDISLAA **RIITAC**FPFVYLS **EECRIGD**HLAELG **ELT**TKTPEANI **IKLPNISA** 89  
Mticd (WP\_224420928.1) **MSKSPKIIYTLTDEAPALATHSLLPIIDAFTD** **SAGID**EVETRDISLAA **RIIT**SLFPVYLS **EECRIGD**HLAELG **ELT**TKTPEANI **IKLPNISA** 89  
Hsicd (WP\_163502434.1) **MSKTPKIIYTLTDEAPALATHSLLPIIDAFTD** **SAGIV**EVETRDISLAA **RIIT**SLFPVYLS **EECRIGD**HLAELG **ELT**TKTPEANI **IKLPNISA** 89  
Mticd (WP\_224415265.1) **MSKSPKIIYTLTDEAPALATHSLLPIIDAFTD** **SAGID**EVETRDISLAA **RIIT**SLFPVYLS **EECRIGD**HLAELG **ELT**TKTPEANI **IKLPNISA** 89

Hpicd **STPOLKAVIKELQ**QGYKLPDYPFA **FQ**SDPE **KLI**QARYDK **VKGS**AVNPVLR **REGNS**DRRAF **VSVKN**VFRKY **PHR**MGEWS **SDSK**SHVA **MS** 178  
Alicd (WP\_148254375.1) **STPOLKAVIKELQ**QGYKLPDYPFA **FQ**SDPE **KLI**QARYDK **VKGS**AVNPVLR **REGNS**DRRAF **VSVKN**VFRKY **PHR**LGEWS **SDSR**SHVA **MS** 178  
Mticd (WP\_224420928.1) **STPOLKAVIKELQ**QGYKLPDYPFA **FQ**SDPE **KLI**QARYDK **VKGS**AVNPVLR **REGNS**DRRAF **VSVKN**VFRKY **PHR**LGEWS **SDSR**SHVA **MS** 178  
Hsicd (WP\_163502434.1) **STPOLKAVIRELQ**QGYKLPDYPFA **FQ**SDPE **KLI**QARYDK **VKGS**AVNPVLR **REGNS**DRRAF **VSVKN**VFRKY **PHR**MGEWS **SDSK**SHVA **MS** 178  
Mticd (WP\_224415265.1) **STPOLKAVIKELQ**QGYKLPDYPFA **FQ**SDPE **KLI**QARYDK **VKGS**AVNPVLR **REGNS**DRRAF **VSVKN**VFRKY **PHR**LGEWS **SDSR**SHVA **MS** 178

Hpicd **EGDFY**CSEK **SALT**EK **TDLK**ELVA **KD**GS **TIVL**KQK **TSVI**E **CE**VVDA **AVMS**RN **ALR**RFVA **DE**VADAKAK **DVLF**SLHLKAT **MMK**VSDP **IM** 267  
Alicd (WP\_148254375.1) **EGDFY**CSEK **SAMT**ATAG **NK**ELVA **DG**ST **QTLK**E **TIVL**GE **VDAA**VMS **RNR**LAR **FVA**E **ED**AK **SRN**VLFS **LHLK**AT **MMK**VSDP **II** 267  
Mticd (WP\_224420928.1) **EGDFY**GSET **SAV**MES **AG**SV **K**ELVA **HG**DG **SVK**LK **BA**VV **LAGE**VD **AA**VMS **RQ**LAR **FVA**E **ED**AK **Q**DVLF **SL**HLKAT **MMK**VSDP **IM** 267  
Hsicd (WP\_163502434.1) **EGDFY**ASEK **SALT**EK **TDLK**ELVA **KD**GS **TIVL**KQK **TSVI**E **CE**VVDA **AVMS**RN **ALR**RFVA **DE**VADAKAK **DVLF**SLHLKAT **MMK**VSDP **II** 267  
Mticd (WP\_224415265.1) **EGDFY**ASET **SAV**MAE **ES**VK **VTL**H **GD**GN **VTV**LK **BA**VV **LAGE**VD **AA**VMS **RQ**LAR **FVA**E **ED**AK **Q**DVLF **SL**HLKAT **MMK**VSDP **IM** 267

Hpicd **FGVIVSEFYQ**VDV **SK**HADD **QAA**G **FD**NN **GIG**DLY **SAL**KS **EE**FR **Q**TC **E**DE **FQ**LYAER **RL**AMV **NS**HKG **IT**NL **HVP**SD **VI**ID **AS**MP **A** 356  
Alicd (WP\_148254375.1) **FGVIVSEFY**EVL **DK**HAG **EL**DK **Y**GF **DN**G **I**GD **LY**ST **IKAL**PK **AK**NE **IT**SD **ES**LYAER **RL**AMV **NS**HKG **IT**NL **HVP**SD **VI**ID **AS**MP **A** 356  
Mticd (WP\_224420928.1) **FGVIVSEFY**EVL **AK**YAD **EL**DK **Y**GF **DN**G **I**GD **LY**AT **Q**SD **AK**R **Q**AT **ES**D **I**Q **LYA**ER **RL**AMV **NS**HKG **IT**NL **HVP**SD **VI**ID **AS**MP **A** 356  
Hsicd (WP\_163502434.1) **FGVIVSEFY**D **VL**AR **YAD**EL **DK**AG **F**DN **S**G **I**GD **LY**AT **IK**EL **PK**AK **Q**EA **IK**AL **Y**ER **LYA**ER **RL**AMV **NS**HKG **IT**NL **HVP**SD **VI**ID **AS**MP **A** 356  
Mticd (WP\_224415265.1) **FGVIVSEFY**EVL **AK**YAD **EL**DK **Y**GF **DN**G **I**GD **LY**AT **Q**SD **AK**R **Q**AT **ES**D **I**Q **LYA**ER **RL**AMV **NS**HKG **IT**NL **HVP**SD **VI**ID **AS**MP **A** 356

Hpicd **MIRD**SC **KMW**GAD **D** **LD**HD **KAVI**PD **RCY**AG **I**Y **Q**V **AT** **ED**CK **N** **G**AL **D**PT **TM**GS **V**PN **V**GL **MAQ**KA **E**EY **G**SH **D**K **T**F **I**PA **D**ST **V**R **V**D **S** **GS**AL 445  
Alicd (WP\_148254375.1) **MLRD**SC **KMW**GAD **DA**LD **HD**KAVI **PD**RCYAG **I**Y **Q**V **AT** **ED**CR **N** **G**AL **D**PT **TM**GS **V**PN **V**GL **MAQ**KA **E**EY **G**SH **D**K **T**F **I**PA **D**ST **V**R **V**D **S** **GS**AL 445  
Mticd (WP\_224420928.1) **MIRD**SC **KMW**GAD **DA**LD **HD**KAVI **PD**RCYAG **I**Y **Q**V **AT** **ED**CK **N** **G**AL **D**PT **TM**GS **V**PN **V**GL **MAQ**KA **E**EY **G**SH **D**K **T**F **I**PA **D**ST **V**R **V**D **S** **GS**AL 445  
Hsicd (WP\_163502434.1) **MIRD**SC **KMW**GAD **D** **LD**HD **KAVI**PD **RCY**AG **I**Y **Q**V **AT** **ED**CK **N** **G**AL **D**PT **TM**GS **V**PN **V**GL **MAQ**KA **E**EY **G**SH **D**K **T**F **I**PA **D**ST **V**R **V**D **S** **GS**AL 445  
Mticd (WP\_224415265.1) **MIRD**SC **KMW**GAD **DA**LD **HD**KAVI **PD**RCYAG **I**Y **Q**V **AT** **ED**CK **N** **G**AL **D**PT **TM**GS **V**PN **V**GL **MAQ**KA **E**EY **G**SH **D**K **T**F **I**PA **D**ST **V**R **V**D **S** **GS**AL 445

Hpicd **VLEH**SV **E** **G**DI **WR**MC **T**K **D**AP **I** **D**W **V**K **L**AV **N** **R**AR **S** **Q**PA **V**FL **D**AN **R**HA **D**AL **I** **K**VE **S** **V** **L**E **H**DT **GL**DIR **I** **M** **P** **D**AM **R**ES **L**ER **I** 534  
Alicd (WP\_148254375.1) **VLEH**SV **E** **G**DI **WR**MC **T**K **D**AP **I** **D**W **V**K **L**AV **N** **R**AR **S** **Q**PA **V**FL **D**AN **R**HA **D**AL **I** **K**VE **S** **V** **L**E **H**DT **GL**DIR **I** **M** **P** **D**AM **R**ES **L**ER **I** 534  
Mticd (WP\_224420928.1) **VLEH**SV **E** **G**DI **WR**MC **T**K **D**AP **I** **D**W **V**K **L**AV **N** **R**AR **S** **Q**PA **V**FL **D**AN **R**HA **D**AL **I** **K**VE **S** **V** **L**E **H**DT **GL**DIR **I** **M** **P** **D**AM **R**ES **L**ER **I** 534  
Hsicd (WP\_163502434.1) **VLEH**SV **E** **G**DI **WR**MC **T**K **D**AP **I** **D**W **V**K **L**AV **N** **R**AR **S** **Q**PA **V**FL **D**AN **R**HA **D**AL **I** **K**VE **S** **V** **L**E **H**DT **GL**DIR **I** **M** **P** **D**AM **R**ES **L**ER **I** 534  
Mticd (WP\_224415265.1) **VLEH**SV **E** **G**DI **WR**MC **T**K **D**AP **I** **D**W **V**K **L**AV **N** **R**AR **S** **Q**PA **V**FL **D**AN **R**HA **D**AL **I** **K**VE **S** **V** **L**E **H**DT **GL**DIR **I** **M** **P** **D**AM **R**ES **L**ER **I** 534

Hpicd **KCED**TI **S**VT **G**N **V**LR **D**YL **T**DL **F**PE **IM**EL **GT**S **AK**ML **S**IV **PL**M **NG**GL **F**ET **G**AG **S**AP **K**H **V**Q **Q** **LE**N **H**LR **W**DS **L**GE **F**L **A**LA **S**LE **H**L **C** **H**D 623  
Alicd (WP\_148254375.1) **QCED**TI **S**VT **G**N **V**LR **D**YL **T**DL **F**PE **IM**EL **GT**S **AK**ML **S**IV **PL**M **NG**GL **F**ET **G**AG **S**AP **K**H **V**Q **Q** **LE**N **H**LR **W**DS **L**GE **F**L **A**LA **S**LE **H**L **C** **H**D 623  
Mticd (WP\_224420928.1) **ACKD**TI **S**VT **G**N **V**LR **D**YL **T**DL **F**PE **IM**EL **GT**S **AK**ML **S**IV **PL**M **NG**GL **F**ET **G**AG **S**AP **K**H **V**Q **Q** **LE**N **H**LR **W**DS **L**GE **F**L **A**LA **S**LE **H**L **C** **H**D 623  
Hsicd (WP\_163502434.1) **KCED**TI **S**VT **G**N **V**LR **D**YL **T**DL **F**PE **IM**EL **GT**S **AK**ML **S**IV **PL**M **NG**GL **F**ET **G**AG **S**AP **K**H **V**Q **Q** **LE**N **H**LR **W**DS **L**GE **F**L **A**LA **S**LE **H**L **C** **H**D 623  
Mticd (WP\_224415265.1) **ACKD**TI **S**VT **G**N **V**LR **D**YL **T**DL **F**PE **IM**EL **GT**S **AK**ML **S**IV **PL**M **NG**GL **F**ET **G**AG **S**AP **K**H **V**Q **Q** **LE**N **H**LR **W**DS **L**GE **F**L **A**LA **S**LE **H**L **C** **H**D 623

Hpicd **N**RA **K**ML **A**LD **A** **D**AN **G** **E**FL **D**SN **K**SP **E** **R**K **V**GE **L**DN **R**GS **H**F **L**Y **L**Y **W** **A**LA **B** **A** **E** **C**SE **S** **E** **M** **O** **T** **F** **E** **R** **L** **A** **D** **A** **L** **T** **A** **K** **E** **A** **T** **I** **V** **E** **L** **N** **S** **V** **O** **G** **O** **P** **E** **D** 712  
Alicd (WP\_148254375.1) **N**RA **K**ML **A**LD **A** **D**AN **G** **E**FL **D**SN **K**SP **E** **R**K **V**GE **L**DN **R**GS **H**F **L**Y **L**Y **W** **A**LA **B** **A** **E** **C**SE **S** **E** **M** **O** **T** **F** **E** **R** **L** **A** **D** **A** **L** **T** **A** **K** **E** **A** **T** **I** **V** **E** **L** **N** **S** **V** **O** **G** **O** **P** **E** **D** 712  
Mticd (WP\_224420928.1) **N**RA **V**FL **A**LD **A** **D**AN **G** **E**FL **D**SN **K**SP **E** **R**K **V**GE **L**DN **R**GS **H**F **L**Y **L**Y **W** **A**LA **B** **A** **E** **C**SE **S** **E** **M** **O** **T** **F** **E** **R** **L** **A** **D** **A** **L** **T** **A** **K** **E** **A** **T** **I** **V** **E** **L** **N** **S** **V** **O** **G** **O** **P** **E** **D** 712  
Hsicd (WP\_163502434.1) **N**RA **V**FL **A**LD **A** **D**AN **G** **E**FL **D**SN **K**SP **E** **R**K **V**GE **L**DN **R**GS **H**F **L**Y **L**Y **W** **A**LA **B** **A** **E** **C**SE **S** **E** **M** **O** **T** **F** **E** **R** **L** **A** **D** **A** **L** **T** **A** **K** **E** **A** **T** **I** **V** **E** **L** **N** **S** **V** **O** **G** **O** **P** **E** **D** 712  
Mticd (WP\_224415265.1) **N**RA **V**FL **A**LD **A** **D**AN **G** **E**FL **D**SN **K**SP **E** **R**K **V**GE **L**DN **R**GS **H**F **L**Y **L**Y **W** **A**LA **B** **A** **E** **C**SE **S** **E** **M** **O** **T** **F** **E** **R** **L** **A** **D** **A** **L** **T** **A** **K** **E** **A** **T** **I** **V** **E** **L** **N** **S** **V** **O** **G** **O** **P** **E** **D** 712

Hpicd **IRGY**HP **D** **H**EL **T**AK **V**MR **PS** **T** **I** **N** **E** **T** **A** **M** **V**AK **G** 744  
Alicd (WP\_148254375.1) **IRGY**HP **D** **H**EL **T**AK **V**MR **PS** **T** **I** **N** **E** **T** **A** **M** **V**AK **G** 744  
Mticd (WP\_224420928.1) **IRGY**HP **D** **H**AL **T**AK **V**MR **PS** **T** **I** **N** **E** **L** **G** **V** **K** **B** 743  
Hsicd (WP\_163502434.1) **IRGY**HP **D** **H**EL **T**AK **V**MR **PS** **T** **I** **N** **E** **L** **G** **V** **V** **A** **G** 744  
Mticd (WP\_224415265.1) **IRGY**HP **D** **H**AL **T**AK **V**MR **PS** **T** **I** **N** **E** **L** **G** **V** **K** **B** 743

icd of *Cobetia amphilecti* N-80

Caicd  
 Psicd (WP\_064482494.1) MGFQKIQVPEEGAKKITANSNDTLNVPNIPIPFIEGGDIGVDVTPAKKIAVDAAVDKAYGGERKIHMEVYAGEKATHVYDADTWLFF 87  
 Pzicd (WP\_128121199.1) MGYQKIQVPEASGDKITVNDNTLNVNPIPIPYIEGGDIGVDISPVMIKVVDAAVEKAYGGERKIAMMEIYAGEKATQVYDQDTWLF 87  
 Haicd (WP\_027351550.1) MAFEKIQLEPAGGEEKITVNAADNSLNVNPIPIPFIEGGDIGVDVTPAKKIAVDAAVEKAYGGERKIHMEVYAGEKATITLYDADTWLFF 87  
 Pbicd (PPC77059.1) MGYQKIQVPEEGAKKITVNAADNSLNVNPIPIPFIEGGDIGVDVSPVMIKVVDAAVEKAYGGERKIAMMEVYAGEKATQVYDQDNTWLF 87

Caicd  
 Psicd (WP\_064482494.1) EETLEAVKDYIVSIKGPLTTPVGGGIRSLNVALRQKLDLYICLRPVRWFTGVPSPVKKEPADVMVIFRENSEDIYAGVEWKAGTPEA 174  
 Pzicd (WP\_128121199.1) KETLEAVRDFVVISIKGPLTTPVGGGIRSLNVALRQELDLYICORPVRWFTGVPSPVKKEPADVMVIFRENSEDIYAGVEWKAGSPEFC 174  
 Haicd (WP\_027351550.1) EETLRVAQEVVVISIKGPLTTPVGGGIRSLNVALRQKLDLYICERPVRWFTGVPTPVKKEPADVMVIFRENSEDIYAGVEWKAGSPEFA 174  
 Pbicd (PPC77059.1) AETLEAVKDYIVVISIKGPLTTPVGGGIRSLNVALRQKLDLYICORPVRWFTGVPSPVKKEPADVMVIFRENSEDIYAGVEWKAGSPEA 174

Caicd  
 Psicd (WP\_064482494.1) DKVIEFLREEMGVNTIRFDECGIGVKPVSEEGTQRLVRKALQAVTIDNDRS SLTLVHKGNIMKFTEGAFKDWGYEIVKDFEGEELLD 261  
 Pzicd (WP\_128121199.1) EKVIKFLTEEMGVKKIRFTENCGIGIKPVSEEGTQRLVRKALQAVVDNDRR SVTIVHKGNIMKFTEGAFKEWGYEVARDFEGEELLD 261  
 Haicd (WP\_027351550.1) DKVIEFLREEMGVNTIRFDECGIGVKPVSEEGTQRLVRKALQAVTIDNDRS SVTLVHKGNIMKFTEGAFKNWGYEVARDEFAEELLD 261  
 Pbicd (PPC77059.1) EKVIKFLTEEMGVKKIRFTENCGIGIKPVSEEGTQRLVRKALQAVTIDNDRS SLTLVHKGNIMKFTEGAFKEWGYEVARDEFAEELLD 261

Caicd  
 Psicd (WP\_064482494.1) GGPWVTFKNPNNGKDIIVKDIADAMLQQIILLRPEYDVIAATLNLNGDYLSDALAAEVGGIGIAPGANISDTIAMFEATHGTAPKYA 348  
 Pzicd (WP\_128121199.1) GGPWVTFKNPNNGKDIIVKDIADAMLQQIILLRPEYDVIAATLNLNGDYLSDALAAEVGGIGIAPGANISDTIAMFEATHGTAPKYA 348  
 Haicd (WP\_027351550.1) GGPWVAHDPNPNNGKRIIVKDIADAMLQQVLLRPEYDVIAATLNLNGDYLSDALAAEVGGIGIAPGANISDAVGMFEATHGTAPKYA 348  
 Pbicd (PPC77059.1) GGPWVTFKNPNNGKDIIVKDIADAMLQQIILLRPEYDVIAATLNLNGDYLSDALAAEVGGIGIAPGANISDTIAMFEATHGTAPKYA 348

Caicd  
 Psicd (WP\_064482494.1) GQDKVNPGSVILSAEMMLRHMGWEEADLIIRNGTEGATAAKGEVTYDPERLMDGAKLLKCSFEFGAIVANNDA 420  
 Pzicd (WP\_128121199.1) GQDKVNPGSVILSAEMMLRHMGWEEADLIIRNGTEGATAAKTIVTYDPERLMDGAKLLKSCSEFGDAMISHM-- 418  
 Haicd (WP\_027351550.1) GQDKVNPGSVILSAEMMLRHMGWEEADLIIRNGTEGATAAKTIVTYDPERLMDGAKLLKSCSEFGDAMISHM-- 418  
 Pbicd (PPC77059.1) GQDKVNPGSVILSAEMMLRHMGWEEADLIIRNGTEGATAAKTIVTYDPERLMDGAKLLKCSFEFGAIVANN-- 418

HpnarG ---MSHFLDRLNFRKRSRPFANRHEGLRSESRQWEVSYRNRWQHDKVVRSSTHGVNCTGSCSWKIVKNGLVTWEQQTDDYFRTRE 84
AanarG (WP\_019699762.1) ---MSHFLDRLNFRKRSRPFANRHEGLRSESRQWEVSYRNRWQHDKVVRSSTHGVNCTGSCSWKIVKNGLVTWEQQTDDYFRTRE 84
AanarG (WP\_019699762.1) ---MSHFLDRLNFRKRSRPFANRHEGLRSESRQWEVSYRNRWQHDKVVRSSTHGVNCTGSCSWKIVKNGLVTWEQQTDDYFRTRE 84
BtнарG (WP\_010677859.1) MAKQNSLFRSLKHLVR-GRINDQWTEENPRDRDWEISYRQWHDKVVRSSTHGVNCTGSCSWKIVKNGLVTWEQQTDDYFRTRE 86
EhnarG (WP\_006810897.1) ---MSKFLDRFRVFKQKGEFADGHCQLDTRDWEVGYRQWHDKVVRSSTHGVNCTGSCSWKIVKNGLVTWEQQTDDYFRTRE 84

HpnarG LPNHEPRGCRGASYSWYLYSNRKLKYPILRKLPLALWRLKANKPDPVDAWASVLEDPARTKQVKKRARGMGGFVRCNDEINELVA 171
AanarG (WP\_019699762.1) LPNHEPRGCRGASYSWYLYSNRKLKYPILRKLPLALWRLKANKPDPVDAWASVLEDPARTKQVKKRARGMGGFVRCNDEINELVA 170
AanarG (WP\_019699762.1) LPNHEPRGCRGASYSWYLYSNRKLKYPILRKLPLALWRLKANKPDPVDAWASVLEDPARTKQVKKRARGMGGFVRCNDEINELVA 170
BtнарG (WP\_010677859.1) EPIVPEPRGCRGASYSWYLYSNRKLKYPILRKLPLALWRLKANKPDPVDAWASVLEDPARTKQVKKRARGMGGFVRCNDEINELVA 173
EhnarG (WP\_006810897.1) LPNHEPRGCRGASYSWYLYSNRKLKYPILRKLPLALWRLKANKPDPVDAWASVLEDPARTKQVKKRARGMGGFVRCNDEINELVA 171

HpnarG ASNVVYIARQVGPDRILGFSPIPAMSMVSYAAGSRVLSLIGVYVMSFYDWYCDLPPASPMTWGEQTDVPESADWNSYIILWGSNVF 258
AanarG (WP\_019699762.1) AANVYIARQVGPDRILGFSPIPAMSMVSYAAGSRVLSLIGVYVMSFYDWYCDLPPASPMTWGEQTDVPESADWNSYIILWGSNVF 257
AanarG (WP\_019699762.1) AANVYIARQVGPDRILGFSPIPAMSMVSYAAGSRVLSLIGVYVMSFYDWYCDLPPASPMTWGEQTDVPESADWNSYIILWGSNVF 257
BtнарG (WP\_010677859.1) ASTIVYIARQVGPDRVGFSPVAMSMVSYAAGSRVLSLIGVYVMSFYDWYCDLPPASPMTWGEQTDVPESADWNSYIILWGSNVF 260
EhnarG (WP\_006810897.1) ASNVVYIARQVGPDRVGFSPVAMSMVSYAAGSRVLSLIGVYVMSFYDWYCDLPPASPMTWGEQTDVPESADWNSYIILWGSNVF 258

HpnarG QTRTPDAHFTTEVRVYGTKEVSVTIDVYENSKLTDLWLSAKGTDALAMAMGHVILKEFHLDN---PSCYTDYVRSYTDMPFLV 342
AanarG (WP\_019699762.1) QTRTPDAHFTTEVRVYGTKEVSVTIDVYENSKLTDLWLSAKGTDALAMAMGHVILKEFHLDN---PSCYTDYVRSYTDMPFLV 344
AanarG (WP\_019699762.1) QTRTPDAHFTTEVRVYGTKEVSVTIDVYENSKLTDLWLSAKGTDALAMAMGHVILKEFHLDN---PSCYTDYVRSYTDMPFLV 341
BtнарG (WP\_010677859.1) QTRTPDAHFTTEVRVYGTKEVSVTIDVYENSKLTDLWLSAKGTDALAMAMGHVILKEFHLDN---PSCYTDYVRSYTDMPFLV 344
EhnarG (WP\_006810897.1) QTRTPDAHFTTEVRVYGTKEVSVTIDVYENSKLTDLWLSAKGTDALAMAMGHVILKEFHLDN---PSCYTDYVRSYTDMPFLV 342

HpnarG LEVRE---DGSAPGQLRASDFDAALGCENNPEWKTVAQETRDLLVVRGSGTGRWGETG---DEVGWNLSL---AAGTEIK 420
AanarG (WP\_019699762.1) LREQALPDGRVVRVDPYVRASDFADRLGCGHPEWKTVAQETRDLLVVRGSGTGRWGETG---DEVGWNLSL---AAGTEIK 427
AanarG (WP\_019699762.1) LKRR---DG---YAPDFHLRASQLDGLGCEQNNPEWKTVAQETRDLLVVRGSGTGRWGETG---DEVGWNLSL---AAGTEIK 423
BtнарG (WP\_010677859.1) LNKR---ENNRSDLELRASDFDQHELG---BWKTVVDEENTNIAVENGSGTGRWGETG---DEVGWNLSL---AAGTEIK 414
EhnarG (WP\_006810897.1) LEEER---DGYAAGMLRSLALVDALGCENNPEWKTVAQETRDLLVVRGSGTGRWGETG---DEVGWNLSL---AAGTEIK 415

HpnarG ELISLANH-HDSVAR---VAFYFPGIEHEHTEHVKGAGVGAADDLPHNLFRKRLKRAQGS---EMLAVTVFDLMAQVAGTDR 497
AanarG (WP\_019699762.1) ELISLEAGDAEAHWETAQVFPYFPGIASEHE-----PANVQSDVHARTVPRRLATVAGGTARVLEAVFDLMAQVAGTDR 508
AanarG (WP\_019699762.1) ERLSLVDG-ADAVGV---VGFYFPGIASEHE-----AEHDELVLRNVVPRRLATVAGGTARVLEAVFDLMAQVAGTDR 485
BtнарG (WP\_010677859.1) ERLSLVKE-SDETVM---VGFYFPGIASEHE-----KEGGKVVGVVPRRMLDNSGN---EMLAVTVFDLMAQVAGTDR 476
EhnarG (WP\_006810897.1) LRLSLVGS-QDETAD---VGFYFPGIASEHE-----LQNVLMHRLFRKRLKRAQGS---EMLAVTVFDLMAQVAGTDR 486

HpnarG GFVGDGEDCETSFDQIRVYTPAWQEKITGVVPAEACTRIAREFVLAHAKTNGRSMIVGAGNHWYHMDNRYGLINMLVMGCGIGV 584
AanarG (WP\_019699762.1) GEP---GELVAGYDDVYTPAWQEKITGVVPAEACTRIAREFVLAHAKTNGRSMIVGAGNHWYHMDNRYGLINMLVMGCGIGV 592
AanarG (WP\_019699762.1) GEP---GGVYASVDDVYTPAWQEKITGVVPAEACTRIAREFVLAHAKTNGRSMIVGAGNHWYHMDNRYGLINMLVMGCGIGV 569
BtнарG (WP\_010677859.1) GK---GDYPTDYNPAAREVYTPAWQEKITGVVPAEACTRIAREFVLAHAKTNGRSMIVGAGNHWYHMDNRYGLINMLVMGCGIGV 560
EhnarG (WP\_006810897.1) GLN---DENCTSYDVKAYTPAWQEKITGVVPAEACTRIAREFVLAHAKTNGRSMIVGAGNHWYHMDNRYGLINMLVMGCGIGV 570

HpnarG SGGGWAHYVGQEKLRPDTGWTLAFGLDWRPFRPNNSTSFYFASHSQWRMEKLEIKELSLPLAKEDVPG-SLIDFNVRAERMGWL 670
AanarG (WP\_019699762.1) SGGGWAHYVGQEKLRPDTGWTLAFGLDWRPFRPNNSTSFYFASHSQWRMEKLEIKELSLPLAKEDVPG-SMIDFNVRAERMGWL 678
AanarG (WP\_019699762.1) SGGGWAHYVGQEKLRPDTGWTLAFGLDWRPFRPNNSTSFYFASHSQWRMEKLEIKELSLPLAKEDVPG-SMIDFNVRAERMGWL 656
BtнарG (WP\_010677859.1) NGGGWAHYVGQEKLRPDTGWTLAFGLDWRPFRPNNSTSFYFASHSQWRMEKLEIKELSLPLAKEDVPG-SKSNMHPADFNAMASRLGWL 644
EhnarG (WP\_006810897.1) SGGGWAHYVGQEKLRPDTGWTLAFGLDWRPFRPNNSTSFYFASHSQWRMEKLEIKELSLPLAKEDVPG-SLIDFNVRAERMGWL 656

HpnarG PSAPLQNNLPLAKKABAACMST---ADYAVOOLKSGEAFFAAEDPDAHENFRNFIWRSNLLGSGKGHEVYMLKLLGTGRLG 754
AanarG (WP\_019699762.1) PSAPLQNNLPLAKKABAACMST---ADYAVOOLKSGEAFFAAEDPDAHENFRNFIWRSNLLGSGKGHEVYMLKLLGTGRLG 762
AanarG (WP\_019699762.1) PSAPLQNNLPLAKKABAACMST---ADYAVOOLKSGEAFFAAEDPDAHENFRNFIWRSNLLGSGKGHEVYMLKLLGTGRLG 740
BtнарG (WP\_010677859.1) PSAPLQNNLPLAKKABAACMST---ADYAVOOLKSGEAFFAAEDPDAHENFRNFIWRSNLLGSGKGHEVYMLKLLGTGRLG 731
EhnarG (WP\_006810897.1) PSAPLQNNLPLAKKABAACMST---ADYAVOOLKSGEAFFAAEDPDAHENFRNFIWRSNLLGSGKGHEVYMLKLLGTGRLG 740

HpnarG CKDLGDFGGQPEEYVWRDEAPEKGLDLDLVDLDFRMSSTOLYSDIVLPLATWYEKDNLNTSDMHPFIHPLTAATDPAWESRSDW 841
AanarG (WP\_019699762.1) CKDLGDFGGQPEEYVWRDEAPEKGLDLDLVDLDFRMSSTOLYSDIVLPLATWYEKDNLNTSDMHPFIHPLTAATDPAWESRSDW 848
AanarG (WP\_019699762.1) GDEAD---ATVYVNNQEDAAEAKGLDLDLVDLDFRMSSTOLYSDIVLPLATWYEKDNLNTSDMHPFIHPLTAATDPAWESRSDW 824
BtнарG (WP\_010677859.1) SDPEQ---SWQEKDNTSEKPEKGLDLDLVDLDFRMSSTOLYSDIVLPLATWYEKDNLNTSDMHPFIHPLTAATDPAWESRSDW 815
EhnarG (WP\_006810897.1) CKDLGDFGGQPEEYVWRDEAPEKGLDLDLVDLDFRMSSTOLYSDIVLPLATWYEKDNLNTSDMHPFIHPLTAATDPAWESRSDW 827

HpnarG KCLAKRFKSKVCGHLEGETDLVTLPMQHSPEGLAQE---ANMDWKKGEAFIPGKTFPSEIVYKRYNETVPEFESVGEHLESIG 926
AanarG (WP\_019699762.1) KCLAKRFKSKVCGHLEGETDLVTLPMQHSPEGLAQE---ANMDWKKGEAFIPGKTFPSEIVYKRYNETVPEFESVGEHLESIG 934
AanarG (WP\_019699762.1) KCLAKRFKSKVCGHLEGETDLVTLPMQHSPEGLAQE---ANMDWKKGEAFIPGKTFPSEIVYKRYNETVPEFESVGEHLESIG 910
BtнарG (WP\_010677859.1) REEAKRFKSKVCGHLEGETDLVTLPMQHSPEGLAQE---ANMDWKKGEAFIPGKTFPSEIVYKRYNETVPEFESVGEHLESIG 901
EhnarG (WP\_006810897.1) KCLAKRFKSKVCGHLEGETDLVTLPMQHSPEGLAQE---ANMDWKKGEAFIPGKTFPSEIVYKRYNETVPEFESVGEHLESIG 913

HpnarG KGIKAWNTDAVEHLEKTLNHRKLD-CPHKGRLELISAIIDAEEMITLAPETNGHVAVKAWDLKSIKGRDHTHLARKKPEDEKIRFR 1012
AanarG (WP\_019699762.1) KGIKAWNTDAVEHLEKTLNHRKLD-CPHKGRLELISAIIDAEEMITLAPETNGHVAVKAWDLKSIKGRDHTHLARKKPEDEKIRFR 1021
AanarG (WP\_019699762.1) KGIKAWNTDAVEHLEKTLNHRKLD-CPHKGRLELISAIIDAEEMITLAPETNGHVAVKAWDLKSIKGRDHTHLARKKPEDEKIRFR 997
BtнарG (WP\_010677859.1) TRGVIPGDKVFEASMDRLGPKSVGVGKLESLITSAIDAEEMITLAPETNGHVAVKAWDLKSIKGRDHTHLARKKPEDEKIRFR 988
EhnarG (WP\_006810897.1) KGIKAWNTDAVEHLEKTLNHRKLD-CPHKGRLELISAIIDAEEMITLAPETNGHVAVKAWDLKSIKGRDHTHLARKKPEDEKIRFR 999

HpnarG VVAQPRKLISSPFWSGLEDHVSYNAGYTNVHELIPWTLVSGROCFYDHAHNRAGFESLIVYRFDIDRAAKGFQLPADNFRKSKA 1099
AanarG (WP\_019699762.1) VVAQPRKLISSPFWSGLEDHVSYNAGYTNVHELIPWTLVSGROCFYDHAHNRAGFESLIVYRFDIDRAAKGFQLPADNFRKSKA 1108
AanarG (WP\_019699762.1) VVAQPRKLISSPFWSGLEDHVSYNAGYTNVHELIPWTLVSGROCFYDHAHNRAGFESLIVYRFDIDRAAKGFQLPADNFRKSKA 1084
BtнарG (WP\_010677859.1) VVAQPRKLISSPFWSGLEDHVSYNAGYTNVHELIPWTLVSGROCFYDHAHNRAGFESLIVYRFDIDRAAKGFQLPADNFRKSKA 1075
EhnarG (WP\_006810897.1) VVAQPRKLISSPFWSGLEDHVSYNAGYTNVHELIPWTLVSGROCFYDHAHNRAGFESLIVYRFDIDRAAKGFQLPADNFRKSKA 1086

|                        |                                                                                             |      |
|------------------------|---------------------------------------------------------------------------------------------|------|
| HpnarG                 | LNFLTPHQKWGIIHSTYSDNLLMLTLNRRGGPVVWLSEADAAEIDIEDNDWIEVYNANGSIAARAVVVSQRVKAGMVM MYHAQERNVNVF | 1186 |
| AanarG(WP_019699762.1) | LNFITPHQKWGIIHSTYTDNLLMLTLNRRGGPCVWISEDDAKRAQIEDNDWIELFNANGALTARAVVVSQRVKPGMVM MYHAQEKIVNTP | 1195 |
| AxnarG(WP_006386096.1) | LNWITPHQKWGIIHSTYSDNLRMLTLNRRGGPHVWVISEAEARQAGLVDNDWVEVFVNVNGTLTARVVVSQRVPVGMCLMYHAQEKIVNVF | 1171 |
| BtnarG(WP_010677859.1) | LRYMTPHQKWGIIHTMFTDTRNMVQLFRGWQVVWLNEDAAEIGIKDNDWIELYNRNGAVVARAVLTYRMPRGAVYMHHAQDRTMGVP     | 1162 |
| EhnarG(WP_006810897.1) | LNFLTPHQKWGIIHSTYSDNLLMLTLNRRGGPIVWVWSEADAKDLGIEDNDWIEVFNSNGALTARAVVVSQRVPAGMTMMYHAQERIVNLF | 1173 |

|                        |                                                                                       |      |
|------------------------|---------------------------------------------------------------------------------------|------|
| HpnarG                 | GSEVTGTRGGIHN SVTRVCPKPTHMIGGYAQLSYSFNYYGTVGSRDEFVLVRKMKHVDWLDGE--GNDSVQKNSAQEAVK     | 1265 |
| AanarG(WP_019699762.1) | GSEVTGTRGGIHN SVTRVVLKPTHMIGGYAQLSYGFNYYGTIGTNRDEFIVLRKMNRVDWLDTP-VADPLVRPTLDQGETA    | 1275 |
| AxnarG(WP_006386096.1) | GAETSGKRGGIHN SVTRTVLKPPTHMIGGYAQQAYGFNYYGTVGANRDEFVVLVRKMKKVDWLEGLPLVEDPAVQTQQEEKQS- | 1251 |
| BtnarG(WP_010677859.1) | GNTINKNRGGIHN SVTRIYPKATHMIGGYSQLSYGFNYYGPTGSQRDTLTIVRPLKEVDWLEN-----                 | 1225 |
| EhnarG(WP_006810897.1) | GSEITEQRGGIHN SVTRITPKPTHMIGGYAQLAYGFNYYGTVGSRDEFVVVRKMKNIINWLDGE--GNDQVQ-----ESVK    | 1247 |

## narI

```

HpnarI      MYDAIAHYLTHLIYGYYPYLAGTVFLLGSLLRFDHGQYTWKGTGSSQMLSSKKNMRLGNSLFHIGIIVIFFGHLVGMMLTPHWVYEPFLHA 88
PbnarI (WP_090438698.1) ---MFEFYLOHLIYGYYPYLAGTVFVLVGSLLRFDHGQYTWKAHSSQILSKKNMRLASNLHFVHGILVIVFFGHLEFGMLTPHWVYAPFLISA 85
PbnarI (WP_090500693.1) ---MFEFYLOHLIYGYYPYLAGTVFVLVGSLLRFDHGQYTWKAHSSQILAKKNMRLASNLHFVHGILVIVFFGHLEFGMLTPHWVYAPFLISA 85
PanarI (WP_147185795.1) ---MFEFYLOHLIYGYYPYLAGTVFVLVGSLLRFDHGQYTWKGTGSSQMLSTKKNMRLASNLHFHIGILVIVFFGHLEFGMLTPHWVYAPFLISA 85
AlnarI (WP_148252143.1) ---MFEFYLOHLIYGYYPYLAGTVFVLVGSLLRFDHGQYTWKGTGSSQMLSSKKNMRLASNLHFHIGIIVIFFGHLVGMMLTPHWVYAPFLISA 85

```

```

HpnarI      GTKQLVAIVVGGIAGAMCVVGGAMLLYRRLANPRVKASSSMMDTLILGLIVLQACLGMVTIIFSLGHMDGEMMLTLLSSWAQSIIVFFSG 176
PbnarI (WP_090438698.1) GNKQLLAIIVGGIAGAMCVVGGAMLLYRRMTNPRVKASSATMDNVILALILFQACLGMITIIIFSLGHLEGDVMLTLASWAQAIVFFSG 173
PbnarI (WP_090500693.1) GNKQLLAIIVGGIAGAMCVVGGAMLLYRRMTNPRVKASSATMDNLILALILFQACLGMITIIIFSLGHLEGDVMLTLASWAQAIVFFSG 173
PanarI (WP_147185795.1) GTKQILAIIVGGIAGVMLVGGAMLLYRRLYNPRVKASSSMMDTLILGLIVLQACLGIITVIFSLGHLDGEMMLTLGWAQSIIVFFSG 173
AlnarI (WP_148252143.1) GAKQILAIIVGGIAGVMLVGGAMLLYRRLENPRVRASSGEMDNLILALILVQACLGLVTVVIFSLGHLDGEMMLTLASWAQAIVFFSG 173

```

```

HpnarI      GAADYMQEVSWIYKLHIFIGLTIILLFPFSRLVHVWSAPLGYVTRRYQLVRRRG 230
PbnarI (WP_090438698.1) GAANYLEEVSWIYKIHFVGLTIILLFPFSRLVHVWSIPLGYLGRNYQIVRKRK 227
PbnarI (WP_090500693.1) GAANYLEEVSWIYKVHIFVGLTIILLFPFSRLVHIVSIPLGYLGRNYQIVRKRK 227
PanarI (WP_147185795.1) NAADYMANVSWIYKLHVFLGLTIILLFPFTRLVHVWSIPLGYLGRRYQIVRRRG 227
AlnarI (WP_148252143.1) GAADYMTQVSWIYKLHIFLGLTIILLFPFTRLVHVWSAPLGYVTRRYQLVRRRK 227

```





## nirD

|                         |          |                        |      |     |        |               |                     |           |        |          |          |          |    |
|-------------------------|----------|------------------------|------|-----|--------|---------------|---------------------|-----------|--------|----------|----------|----------|----|
| HpnirD                  | -MTATAMK | KEMDMADVHNSEAFENHASENN | TA-- | WQK | VCTKD  | DLVAFSGIAAWLE | TAE                 | GPAQVAIFY | LPG-LG | QGKGD    | ELFALDHH | 82       |    |
| CanirD                  | -MTSPAL  | ATTFSTPLSSPSSATQD      | TSAA | TS  | PLRW   | VTLCQRE       | DLVPGSGVAAWLE       | ADGQAR    | QIALFT | LPATVDS- | DDLT     | LF       | 84 |
| HvnirD (WP_125746047.1) | -MTATALK | -----                  | HTV  | STD | T---   | WQPL          | CTKADLVAFSGVAAWLNT  | PEGPA     | QVAIFY | LPKQH    | POGHEK   | ELYALDHF | 66 |
| AhnirD (WP_092568117.1) | MTTATALK | -----                  | TET  | D   | TMT--- | WQT           | ICSKADLVAFSGVAAWLNT | SDGPA     | QVALFY | LPG----  | HDQ      | ELYAVDHH | 62 |
| HhnirD (WP_095602547.1) | -MTATALK | -----                  | HTV  | STD | T---   | WQPL          | CAKADLVAFSGVAAWLNT  | SEGPA     | QVAIFY | LPRQR    | SQGEK    | ELYAIDHF | 66 |

|                         |                      |            |               |            |         |           |         |     |
|-------------------------|----------------------|------------|---------------|------------|---------|-----------|---------|-----|
| HpnirD                  | DPFSNANVIARGIVGDLKGS | AVVASPIYKQ | FRLEDGQCLEDED | VKLRTWKV   | EFKG    | DEVWVEG   | -----   | 145 |
| CanirD                  | DPVSGANVIARGLLGDHAGE | PLVISPLYKQ | RYRLSDGQCLDD  | TLALTVPVRL | AGGEVQV | QCORTDDAC |         | 154 |
| HvnirD (WP_125746047.1) | DPFSNANVIARGIIGDVKGN | PVVASPLYKQ | FRLEDGQCLEDEN | IKLRTWKV   | AFRGE   | EVWVAG    | -----   | 129 |
| AhnirD (WP_092568117.1) | DPFSRANVIARGIVGDLKGP | VVASPIYKQ  | FRLEDGQCLEDES | VQLRTWKV   | SFKG    | DEVCI     | EV----- | 125 |
| HhnirD (WP_095602547.1) | DPFSNANVIARGIIGDIKGS | SVVASPLYKQ | FRLEDGQCLEDEN | IKLRTWKV   | AFRGE   | EVWVQ     | -----   | 129 |

## nirS

HpnirS MKKRNRYLRPLAVVTAASGLGIVHFFEDFNQDQEAERYRGTGSPVDAASANAVRTPGAPDLTEEFERAKEIYFQRCAGCHG 86  
 FbnirS (MCG8523864.1) MRVETKMLKPLALAVAITSGVNAQAAPKADK---STMAYGTTSAVVAESAARIVRSPGAPDLTDFEFKAKQIYFQRCAGCHG 83  
 MsnirS (GB088462.1) MRVSNMLKPLALAVASGTVTAQAAPKADK---SSVAYGTTASAVVPSARVVRTPGAPDLTDFEFKAKQIYFQRCAGCHG 83  
 MpnirS (WP\_091705256.1) MRVETKMLKPLAMAVFASGTVTAQAAPKADK---STMAYGTTSTVTPSSAKSVRTPGAPDLTDFEFKAKQIYFQRCAGCHG 83  
 MnnirS (WP\_227548888.1) -----MKPLALAVAITSGVNAQAAPKADK---STMAYGTTSAVVAESAARIVRSPGAPDLTDFEFKAKQIYFQRCAGCHG 77

HpnirS VLRKGTGKPLTDTIQEGLDYLKVFINYGSPAGMPNWCTSGDFEEVELMAKYVMHEPPVPEPFLADMKETWEVIVPPEDRF 172  
 FbnirS (MCG8523864.1) VLRKGTGKPLTDTIQEGLDYLKVFINYGSPAGMPNWCTSGDFEEVELMAKYVMHEPPVPEPFLADMKETWEVIVPPEDRF 169  
 MsnirS (GB088462.1) VLRKGTGKPLTDTIQEGLDYLKVFINYGSPAGMPNWCTSGDLTDFEEVELMAKYVMHEPPVPEPFLADMKETWEVIVPPEDRF 169  
 MpnirS (WP\_091705256.1) VLRKGTGKPLTDTIQEGLDYLKVFINYGSPAGMPNWCTSGDFEEVELMAKYVMHEPPVPEPFLADMKETWEVIVPPEDRF 169  
 MnnirS (WP\_227548888.1) VLRKGTGKPLTDTIQEGLDYLKVFINYGSPAGMPNWCTSGDFEEVELMAKYVMHEPPVPEPFLADMKETWEVIVPPEDRF 163

HpnirS TRQMNLDLLENMFVSLTRDAGQIALIDGSEVVKIIDTGYAVHISRMSAGRYVVTGRDALINMIDLWEEEPQIVAKIKVGMEA 258  
 FbnirS (MCG8523864.1) TRQMNLDLLENMFVSLTRDAGQIALIDGSEVVKIIDTGYAVHISRMSAGRYVVTGRDALINMIDLWEEEPQIVAKIKVGMEA 255  
 MsnirS (GB088462.1) TRQMNLDLLENMFVSLTRDAGQIALIDGSEVVKIIDTGYAVHISRMSAGRYVVTGRDALINMIDLWEEEPQIVAKIKVGMEA 255  
 MpnirS (WP\_091705256.1) TRQMNLDLLENMFVSLTRDAGQIALIDGSEVVKIIDTGYAVHISRMSAGRYVVTGRDALINMIDLWEEEPQIVAKIKVGMEA 255  
 MnnirS (WP\_227548888.1) TRQMNLDLLENMFVSLTRDAGQIALIDGSEVVKIIDTGYAVHISRMSAGRYVVTGRDALINMIDLWEEEPQIVAKIKVGMEA 249

HpnirS RSVETSKEFGYEDRFALAGYWPQVIMDGDTLEPKKIVSTRGMTVDTQEYHPEPRVAIVASHHPPEFIVNVKETGKILVNYE 344  
 FbnirS (MCG8523864.1) RSVETSKEYGWEKDLAIACTYWPQVIMDGDTLEPKKIVSTRGMTVDTQEYHPEPRVAIVASHHPPEFIVNVKETGKILVNYE 341  
 MsnirS (GB088462.1) RSVETSKEYGWEKDLAIACTYWPQVIMDGDTLEPKKIVSTRGMTVDTQEYHPEPRVAIVASHHPPEFIVNVKETGKILVNYE 341  
 MpnirS (WP\_091705256.1) RSVETSKEYGWEKDLAIACTYWPQVIMDGDTLEPKKIVSTRGMTVDTQEYHPEPRVAIVASHHPPEFIVNVKETGKILVNYE 341  
 MnnirS (WP\_227548888.1) RSVETSKEYGWEKDLAIACTYWPQVIMDGDTLEPKKIVSTRGMTVSTRQYHPEPRVAIVASHHPPEFIVNVKETGKILVNYE 335

HpnirS NDLDAISVETLRSFLHDGGWDSRYRFMTAANSNKILVVDQDRNLEAVVDVGTQHPGRGANVDFPEGEVWATSHLGDNTIC 430  
 FbnirS (MCG8523864.1) DMEVMNLSIDARFLHDGGWDSRYRFMTAANSNKILVVDQDRNLEAVVDVGTQHPGRGANVDFPEGEVWATSHLGDNTIC 427  
 MsnirS (GB088462.1) DDLDSVETLDAARFLHDGGWDSRYRFMTAANSNKILVVDQDRNLEAMVDVGTQHPGRGANVDFPEGEVWATSHLGDNTIC 427  
 MpnirS (WP\_091705256.1) DLDVMSHTLDAARFLHDGGWDSRYRFMTAANSNKILVVDQDRNLEAMVDVGTQHPGRGANVDFPEGEVWATSHLGDNTIC 427  
 MnnirS (WP\_227548888.1) DMEVMNLSIDARFLHDGGWDSRYRFMTAANSNKILVVDQDRNLEAVVDVGTQHPGRGANVDFPEGEVWATSHLGDNTIC 421

HpnirS LIGTDFEHPENAWRVVRLTGQGGGSLFKTHESSNLYVDTELNPCBEISQSVAVYDLNDLEAGYVLPPIAWADLGEQPKRVV 516  
 FbnirS (MCG8523864.1) MIGTDFKHPDKAWKVVRTVGGGGSLFKTHESSNLYVDTELNPCBEISQSVAVYDLNDLEAGYVLPPIAWADLGEQPKRVV 513  
 MsnirS (GB088462.1) LIGTDFEHPDKAWKVVRTVGGGGSLFKTHESSNLYVDTELNPCBEISQSVAVYDLNDLEAGYVLPPIAWADLGEQPKRVV 513  
 MpnirS (WP\_091705256.1) MIGTDFEHPDKAWKVVRTVGGGGSLFKTHESSNLYVDTELNPCBEISQSVAVYDLNDLEAGYVLPPIAWADLGEQPKRVV 513  
 MnnirS (WP\_227548888.1) MIGTDFEHPDKAWKVVRTVGGGGSLFKTHESSNLYVDTELNPCBEISQSVAVYDLNDLEAGYVLPPIAWADLGEQPKRVV 507

HpnirS QPEYNEKGEVWVFSVNNAMDQESALVIVDDTRKLLKVIKDERLVPTGKFNINTCQHDVY 577  
 FbnirS (MCG8523864.1) QPEYNEKGEVWVFSVNNAMDQESALVIVDDTRKLLKVIKGVYLVPTGKFNINTCQHDVY 574  
 MsnirS (GB088462.1) QPEYNEKGEVWVFSVNNAMDQESALVIVDDTRKLLKVIKGVYLVPTGKFNINTCQHDVY 574  
 MpnirS (WP\_091705256.1) QPEYNEKGEVWVFSVNNAMDQESALVIVDDTRKLLKVIKGVYLVPTGKFNINTCQHDVY 574  
 MnnirS (WP\_227548888.1) QPEYNEKGEVWVFSVNNAMDQESALVIVDDTRKLLKVIKGVYLVPTGKFNINTCQHDVY 568



## norC

|                         |       |             |           |          |          |       |       |       |      |      |      |      |     |     |     |       |     |       |    |   |     |    |    |    |    |   |    |    |   |   |   |   |   |   |   |   |   |   |   |   |   |   |   |   |   |   |   |    |
|-------------------------|-------|-------------|-----------|----------|----------|-------|-------|-------|------|------|------|------|-----|-----|-----|-------|-----|-------|----|---|-----|----|----|----|----|---|----|----|---|---|---|---|---|---|---|---|---|---|---|---|---|---|---|---|---|---|---|----|
| HpnorC                  | MADGI | TKSAARNIF   | YGGSLFFF  | LLFAAL   | TAHSHWY  | MVNV  | STDSE | GLTDS | SVKH | GKEV | WEK  | NM   | CIN | CHT | IM  | GEGAY | FAP | EL    | SN | W | E   | RY | GG | 88 |    |   |    |    |   |   |   |   |   |   |   |   |   |   |   |   |   |   |   |   |   |   |   |    |
| HsnorC (WP_027950149.1) | MME   | SLSRSAARNIF | FGGSLFFF  | LAFAG    | LTAHSHWY | MVNV  | STDKE | GLTES | VAA  | GKH  | VWE  | KHS  | CIN | CH  | SLI | GEGAY | FAP | EL    | GN | V | W   | TR | Y  | GG | 88 |   |    |    |   |   |   |   |   |   |   |   |   |   |   |   |   |   |   |   |   |   |   |    |
| CcnorC (WP_183317601.1) | MAD   | SLTKSAARNV  | FYGGSLFFF | VIFV     | GLTAHSHY | FMVNV | STDK  | AGLTD | AVAR | GKH  | VWE  | KHS  | CIN | CH  | TLL | GEGAY | FAP | EL    | GN | V | W   | DR | W  | GG | 88 |   |    |    |   |   |   |   |   |   |   |   |   |   |   |   |   |   |   |   |   |   |   |    |
| TnnorC (WP_043740377.1) | MME   | GLSRAAARNIF | LGGSLFFF  | VVFVA    | LTAHSHWY | I     | VTQ   | STDH  | AGL  | TES  | SVKH | GKEV | WEE | HS  | CIN | CH    | TLL | GEGAY | F  | G | PEL | GN | V  | W  | VR | Y | GG | 88 |   |   |   |   |   |   |   |   |   |   |   |   |   |   |   |   |   |   |   |    |
| AanorC (WP_128291034.1) | M     | SERF        | TKSAARNIF | YGGSIFFF | VAFV     | GLTAE | SHWH  | I     | VSQ  | STD  | TAT  | LT   | PS  | VAH | GKR | V     | WE  | K     | N  | A | C   | I  | D  | C  | H  | T | L  | L  | G | E | G | A | Y | F | A | P | E | L | G | N | V | W | V | R | Y | G | G | 88 |

|                         |     |     |        |        |       |      |      |      |      |     |      |      |     |      |      |     |     |     |     |     |   |   |   |   |   |     |   |     |   |   |   |   |   |   |   |   |   |     |
|-------------------------|-----|-----|--------|--------|-------|------|------|------|------|-----|------|------|-----|------|------|-----|-----|-----|-----|-----|---|---|---|---|---|-----|---|-----|---|---|---|---|---|---|---|---|---|-----|
| HpnorC                  | LEN | PEA | ARAGI  | NAWIRA | QPL   | GIE  | GRRQ | MPA  | FDF  | SEK | DMNS | LID  | FLE | WINS | IND  | QD  | WPP | HP  | PAG | 150 |   |   |   |   |   |     |   |     |   |   |   |   |   |   |   |   |   |     |
| HsnorC (WP_027950149.1) | REN | PDA | ARAGI  | KGIKA  | QPL   | NVP  | GRRQ | MPK  | FDL  | SEE | ELDN | LV   | DF  | FR   | WADS | INT | Q   | G   | W   | P   | P | H | P | V | G | 150 |   |     |   |   |   |   |   |   |   |   |   |     |
| CcnorC (WP_183317601.1) | TED | PDT | ARE    | MLKAW  | MQS   | QPT  | GIE  | GRRQ | MPQ  | FNL | SDQ  | ELND | LAD | FLE  | WT   | GRI | K   | T   | Q   | N   | W | P | P | N | K | A   | G | 150 |   |   |   |   |   |   |   |   |   |     |
| TnnorC (WP_043740377.1) | PDS | PE  | GARAGI | KAWMQI | QPT   | GIP  | GRRQ | MPN  | FDL  | TDA | EL   | DAL  | V   | DF   | FE   | WMS | R   | INT | Q   | G   | W | P | P | H | V | A   | G | 150 |   |   |   |   |   |   |   |   |   |     |
| AanorC (WP_128291034.1) | RD  | D   | PEI    | ARE    | GLKAW | IRSM | PT   | GIE  | GRRQ | MPH | FDL  | SE   | KE  | LN   | D    | L   | I   | D   | F   | L   | E | W | T | S | R | I   | D | T   | Q | D | W | P | P | N | D | A | G | 150 |

HpnosZ MSDKRKHIDQ-----IGRRHFTIRNTAVTGVAGAG---LASCFGAGALNSRQVAAAGANG--IDVAPGELDYYGFWSGGHSGEV 75  
 MnosZ (WP\_222448800.1) MKKRDDLTKDTEPEVSEGELSRRRRFMCAPALAGVAGAT----CHCSVMSRETFWAAAAABEARNKAHVAIPGELDYYGFWSGGHSGEV 82  
 ManosZ (WP\_230707954.1) MKKRDDLTKDLELPESEGQRFRFMCAPALAGVAGAT----CHCAVMSRETFWAAAAABEARNKYVIFPGELDYYGFWSGGHSGEV 82  
 MgnosZ (WP\_091987576.1) MKKRDDLTKGSALPESEGQRFRFMCAPALAGVAGAT----CHCAVMSRETFWAAAAABEARNKWIIFPGELDYYGFWSGGHSGEV 82  
 HcnosZ (WP\_011397207.1) MDAIKKSHHTEDARDSCISRRGFTLGGAVTGVSAVIGMAAMTFCGCSVMSRETFWAAAAKTHQKASVIFPGELDYYGFWSGGHSGEV 88

HpnosZ RVLGVPSMRELMRIPEVFNVDSATGWGITSNESKRLICSSSRFENGDCHHPHISMTDCGYDGKYLFINDKANTRVARIRLDIMKCDKIIIT 163  
 MnosZ (WP\_222448800.1) RVLGVPSMRELMRIPEVFNVDSATGWGITSNESKRLIGDQQLFENGDCHHPHISMTDCGYDGKYLFINDKANTRVARIRLDIMKCDKIIIT 170  
 ManosZ (WP\_230707954.1) RVLGVPSMRELMRIPEVFNVDSATGWGITSNESKRLVLDHNDTHFENGDCHHPHISMTDCGYDGKYLFINDKANTRVARIRLDIMKCDKIIIT 170  
 MgnosZ (WP\_091987576.1) RVLGVPSMRELMRIPEVFNVDSATGWGLTINESKRLVLDSSSRFENGDCHHPHISMTDCGYDGKYLFINDKANTRVARIRLDIMKCDKIIIT 170  
 HcnosZ (WP\_011397207.1) RVLGVPSMRELMRIPEVFNVDSATGWGLTINESKRLVLDSSSRFENGDCHHPHISMTDCGYDGKYLFINDKANTRVARIRLDIMKCDKIIIT 176

HpnosZ IPNVQAIHGLRLQKVPKTYVFNAAELPIEIQNDGCELENPDNYETMFNAIDAEISMVAVQWIVDGNLNDTDADYTGKVAASCTCYNSE 251  
 MnosZ (WP\_222448800.1) IPNVQAIHGLRLQKVPKTYVFNAAEYVIEIQNDGCELENPDNYETMFNAIDAEISMVAVQWIVDGNLNDTDADYTGKVAASCTCYNSE 257  
 ManosZ (WP\_230707954.1) IPNVQAIHGLRLQKVPKTYVFNAAEYVIEIHNDSGTSITSEETMFNAVDATIMEVAFOVIVDGNLNDTDADYTGKVAASCTCYNSE 257  
 MgnosZ (WP\_091987576.1) IPNVQAIHGLRLQKVPKTYVFNAAEYVIEIHNDSGTSITSEETMFNAVDATIMEVAFOVIVDGNLNDTDADYTGKVAASCTCYNSE 257  
 HcnosZ (WP\_011397207.1) IPNVQAIHGLRLQKVPKTYVFNAAEYVIEIQNDGCELENPDNYETMFNAVDATIMEVAFOVIVDGNLNDTDADYTGKVAASCTCYNSE 264

HpnosZ KGMVTEPMRNRDQWVVFVDEALTEAVANQNYKTLGESSFVPLDGRKQSCFTRVIFPKNPHGWNTPDGKYFIANGKLSPTVSIITA 339  
 MnosZ (WP\_222448800.1) RAVLDAGTMRNRDQWVVFVDEALTEAVANQNYKTLGESSFVPLDGRKQSCFTRVIFPKNPHGLNTPDGKYFIANGKLSPTVSIITA 345  
 ManosZ (WP\_230707954.1) RALDLAGTMRNRDQWVVFVDEALTEAVANQNYKTLGDSKVPVVDGRAGSEFTRVIFPKNPHGLNTPDGKYFIANGKLSPTVSIITA 345  
 MgnosZ (WP\_091987576.1) RALDLAGTMRNRDQWVVFVDEALTEAVANQNYKTLGDSKVPVLDGRAGSEFTRVIFPKNPHGLNTPDGKYFIANGKLSPTVSIITA 345  
 HcnosZ (WP\_011397207.1) KGLDLAGTMRNRDQWVVFVDEALTEAVANQNYKTLGDSKVPVVDGRAGSEFTRVIFPKNPHGLNTPDGKYFMANGKLSPTVSIITA 352

HpnosZ IDKLDLLEFDKIE-IRDFIVGPELGLGLPHTTFDGRGNAYTTLFIDSQVAKWNIDAIRHYNCGEDVNYIROKLDVYQPGHNHASIT 426  
 MnosZ (WP\_222448800.1) IDKLDLLEFDKIE-IRDFIVGPELGLGLPHTTFDGRGNAYTTLFIDSQVAKWNIDAIRHYNCGEDVNYIROKLDVYQPGHNHASIT 432  
 ManosZ (WP\_230707954.1) IDKLDLLEFDKIE-IRDFIVGPELGLGLPHTTFDGRGNAYTTLFIDSQVAKWNIDAIRHYNCGEDVNYIROKLDVYQPGHNHASIT 432  
 MgnosZ (WP\_091987576.1) IDKLDLLEFDKIE-IRDAVVGPELGLGLPHTTFDGRGNAYTTLFIDSQVAKWNIDAIRHYNCGEDVNYIROKLDVYQPGHNHASIT 432  
 HcnosZ (WP\_011397207.1) IDKLDLLEFDKIE-IRDFIVGPELGLGLPHTTFDGRGNAYTTLFIDSQVAKWNIDAIRHYNCGEDVNYIROKLDVYQPGHNHASIT 440

HpnosZ ESRDADGKWLVLKFSKDRFLFVGPLHEENDQLIDISGEMKLVHDGPTFAEPHDCILVRDQINPSRWTFRDDPPFFAVAVAAEAD 514  
 MnosZ (WP\_222448800.1) ESRDADGKWLVLKFSKDRFLFVGPLHEENDQLIDISGEMKLVHDGPTFAEPHDCILVRDQINPKKLYFRDDPPFFAVAVAAEAD 520  
 ManosZ (WP\_230707954.1) ESRDADGKWLVLKFSKDRFLFVGPLHEENDQLIDISGEMKLVHDGPTFAEPHDCILVRDQINPKKLYFRDDPPFFAVAVAAEAD 520  
 MgnosZ (WP\_091987576.1) ESRDADGKWLVLKFSKDRFLFVGPLHEENDQLIDISGEMKLVHDGPTFAEPHDCILVRDQINPKKLYFRDDPPFFAVAVAAEAD 520  
 HcnosZ (WP\_011397207.1) ESRDADGKWLVLKFSKDRFLFVGPLHEENDQLIDISGEMKLVHDGPTFAEPHDCILVRDQINPLKTVSRDDPPFFAVAVAAEAD 528

HpnosZ GVNLEGSCKVIREGNKRVVMTSIAFVYGLTEFRVKQGDDEVTVITNLDMVEDVTHGFCMVNHNQVSMESPOQASVSTETACKRGGVHW 602  
 MnosZ (WP\_222448800.1) GVNLESDNKVIREGNKRVVMTSIAFYGMTEFRVKQGDDEVTVITNLDMVEDVTHGFCMVNHNQVSMESPOQASVSTETACKRGGVHW 608  
 ManosZ (WP\_230707954.1) GVNLEADNKVIREGNKRVVMTSIAFYGMTEFRVKQGDDEVTVITNLDTIEDVTHGFCMVNHNQVSMESPOQASVSTETACKRGGVHW 608  
 MgnosZ (WP\_091987576.1) GVNLEADNKVIREGNKRVVMTSIAFYGMTEFRVKQGDDEVTVITNLDTIEDVTHGFCMVNHNQVSMESPOQASVSTETACKRGGVHW 608  
 HcnosZ (WP\_011397207.1) GVNLEADNKVIREGNKRVVMTSIAFYGLTEFRVKQGDDEVTVITNLDMVEDVTHGFCMVNHNQVSMESPOQASVSTETACKRGGVHW 616

HpnosZ YYCNWFCHALHMEMGRMIVKKA 625  
 MnosZ (WP\_222448800.1) YYCNWFCHALHMEMGRMIVKKA 631  
 ManosZ (WP\_230707954.1) YYCNWFCHALHMEMGRMIVKKA 631  
 MgnosZ (WP\_091987576.1) YYCNWFCHALHMEMGRMIVKKA 631  
 HcnosZ (WP\_011397207.1) YYCNWFCHALHMEMGRMIVKKA 639

Hppcc MSHPLHESFRNWRILGDLNQLRIADLGGAFVDKIETIRAHAKRCQCG---SLQQRRELLDYELDELPEQDILLPVTRAFNFOFLNLNNTA 86  
 Cappc MSHPLHESFRNWRILGDLNQLRIADLGGDFVARIETIRALAKRCQCG---QAARHELIDYELDELPEQDILLPVTRAFNFOFLNLNNTA 86  
 Oस्पcc (WP\_019935846.1) --MNNHAAARNVVLLGOLLGDAIRDHFGAFVDKIETIRALAKSARQCG---DNDQQRLLITVLLGSDDELPLVTRAFNFOFLNLNNTA 84  
 Mdppc (WP\_017223576.1) -MSKYAALRSRNLGOLLGDLNQLRIADLGGAFVDKIETIRALAKSSAAG---DKDKRALITVLLGSDDELPLVTRAFNFOFLNLNNTA 85  
 Flppc (WP\_003189102.1) MSPLDARLRSDVHLLGDLNQLRIADLGGAFVDKIETIRGAKADIRGAVSEKTAGDELASLNQLQEDELPLVTRAFNFOFLNLNNTA 88

Hppcc BQHYRARFRVREYKFGSQPVLCGLLRRAEQAGNSPRLLVETLANMRVBLVLTAAHPTVEVTRRTTLQKYDAIDELCTLAESSESDYPERGT 175  
 Cappc BQHYRGRFRVREYRGSQPDLCGLTIRIRERGFSAQKIVEEASMRVBLVLTAAHPTVEVTRRTTLQKYDAIEGCLTQMEGACDRPECAT 175  
 Oस्पcc (WP\_019935846.1) BQEHITSRGGRKAG---PNPLDEVSRFLKGNVNSQADIRGAVTLDLIDLVLTAHPTVEVTRRTTLQKYRVEINCDLAAWEL-DLDPEDRKT 169  
 Mdppc (WP\_017223576.1) BQVHTTSRNCADLVCV---PDSDELFLKNNISEQEVISAKNNLNDLVLTAHPTVEVTRRTTLQKRGKINIKKSQLLETLSLSDQRN 172  
 Flppc (WP\_003189102.1) BQYQLIHRRDESQPAFFESRVLPELRLRQSEGHNSNELARCARLDLDELVLTAHPTVEVTRRTTLQKYDAIAAQLQDHRDLTTARE 177

Hppcc RAQRRLLELLIQAWHTDEIRHERPPTVDEAKWGFAIENSLSWQAVEDEHRLDNLILDTAEEELPLDAAPIRNASWGGDRDGNENVTA 264  
 Cappc LARARITLILIQAWHTDEIRHERPPTVDEAKWGFAIENSLSWQAVEDEHRLDNLIDEMTLDAAGEELPLDAAPIRNASWGGDRDGNENVTA 264  
 Oस्पcc (WP\_019935846.1) ELLARIDLLIQAWHSNIEISQRPTVDEAKWGFAIENSLSWQAVEDEHRLDNLQWRRELELPLNAAPEVTRNASWGGDRDGNENVTA 258  
 Mdppc (WP\_017223576.1) VYMTRELVLLIQAWHTDEIRVPRPTVDEAKWGFAIENSLSWQAVEDEHRLDNLQDRLLDYGLPDAISVFKVTSWGGDRDGNENVTA 261  
 Flppc (WP\_003189102.1) QIRERLQRLIQAWHTDEIRVPRPTVDEAKWGFAIENSLSWQAVEDEHRLDNLQAAHAATLELPLDAAPIRNASWGGDRDGNENVTA 266

Hppcc RVTRVLLIGRWMAADLYLRDIDELASELSMWKANSALRAEAGQVABPYREVLKRLLRKAKWESRDWARAGDEKRRHGVDTITREOLY 353  
 Cappc SVTRVLLIGRWMAADLYLRDIDELASELSMWKCTAALRAEAGQVABPYREVLKRLILRRESRDWARAGDEKRRHGVDTITREOLY 353  
 Oस्पcc (WP\_019935846.1) RVTEVLLIGRWMAASLYLRDIDELVSELSMDSASTELRAASQSDDEPYRAVLRQDREDRELLHLNRVQKTDAROLDITQTEOFR 347  
 Mdppc (WP\_017223576.1) KVTEVLLIGRWMAIHFLKDVTHLASELSMNCDDTLRALVCESEHPYRWLLKIRSELTETLASLTHQKKESTESRDTITKTAOFR 350  
 Flppc (WP\_003189102.1) RVTRVLLIGRWMAADLYLRDIDELASELSMQOASFLHAKVCESEVPEYRALLKQRRERARAROWAHTSTSTTTPAPADVLQNNRDL 355

Hppcc SPLIACYRSILCDVGLDTTANGALLDLRRVAVFGVLLKLDLRQEASRHAQVFEELTSALGLGHVQWDEAKRQFLLEELASRRRPLIF 442  
 Cappc TPLIACYRSILCDVGLDTTANGALLDLRRVAVFGVLLKLDLRQESTRHAQVFEELTSQTLGLGVNFWDEQQRCEFLTKELACRRRPLIF 442  
 Oस्पcc (WP\_019935846.1) QPEELCYRSIQCGGLGKATADGLLWVIRKACGVLLEKLDLRQDGERHAQVAEELTRVGLGQVWDESEADKQAPLNLNLSRRRPLIF 436  
 Mdppc (WP\_017223576.1) QPLIACYRSINACGMVAITAKGALLDIRRECGVGLLEKLDLRQDSDRHTDVAEAVTRVGLGQVWDESEADKQAPLNLNLSRRRPLIF 439  
 Flppc (WP\_003189102.1) APLOLYCYSLHECGMVAITAGFLLDLRRVAVFGVLLKLDLRQDSSRHSAAATEITDYLLGLGRWEDMDEBARISELTCPLTNRRRPLIF 444

Hppcc RRWFCSLEIREVLDTRVITQEHSEALCYIITSMAGAESDVLVGLLMKVECGQVTLTIFLFFETINDLHAQDWDQDLAIVCYRSIL 531  
 Cappc RRWFCSLEIREVLDTRVITREHREALCYIITSMAGAESDVLVGLLMKVECGQVTLTIFLFFETINDLHRSFVHTDLGKIVYREQA 531  
 Oस्पcc (WP\_019935846.1) RWFQESDTRVLDTRVITRSHRPODAICVYITSMAGAESDVLVGLLKECGVDFAVIRLFFETINDLQAGAAVIRVYQGWRRGVY 525  
 Mdppc (WP\_017223576.1) ICWQESAVIREVLDTRVITKQDFESICVYITSMARKAESDVLVGLLKECGCFPLRVAVFLFFETINDLNAATWTASLADWVNYL 528  
 Flppc (WP\_003189102.1) GYRESADTAVLNTQPLTAAAPAAAGSVYVSMAGAESDVLVGLLKECGVQRFVIRVFLFFETINDLNAQFVWERLQLLGLFRAR 533

Hppcc DDRQEVMIQYSDSAKDAGQLAAAWAQYRAQESLVNVCNRHGVELLPHFGRGGTVGRGGGPAHAALLSQPPGSVNSURVTEQGMIRFK 620  
 Cappc GDRQEVMIQYSDSAKDAGQLAAAWAQYRAQETLVEVTKRHGVELLPHFGRGGTVGRGGGPAHAALLSQPPGSVNSURVTEQGMIRFK 620  
 Oस्पcc (WP\_019935846.1) NGRQEVMIQYSDSAKDAGQVIAASWAQYSEMLKLVATSEREKVLLPHFGRGGSLGRGGGPAKCAILASQPPGSLTIGURVTEQGMIRFK 614  
 Mdppc (WP\_017223576.1) NGHCHEMIQYSDSAKDAGVIAASWAQYSEMLVATCEQEDINLLPHFGRGGSLGRGGGPAHAALLSQPPGSVNSURVTEQGMIRFK 617  
 Flppc (WP\_003189102.1) QGRQEVMIQYSDSAKDAGTAAAWAQYRAQERLVDICREQQVELLPHFGRGGTVGRGGGPAHAALLSQPPGSVNSURVTEQGMIRFK 622

Hppcc FGLPDIALRSMEIYACAVLEALLLPPRAFEHHVREEMDOLKVAHGAVGVVREDEDFVYFRVAVPPEGALGRLPLGSRERKRRQGGV 709  
 Cappc FGLPDIASRSMEIYVCAVLEASMLPPEAKQOVRDEMDRLAGIAHKKVGVVREDEDFVYFRVAVPPEGALGRLPLGSRERKRRQGGV 709  
 Oस्पcc (WP\_019935846.1) FGLQVADISITLYASVLEALLLPPREFKPEWRKIMNDVSEVCAHYSRITAGEDFVYFRVAVPPELGLKPLGSRERKRRQGGV 703  
 Mdppc (WP\_017223576.1) FGLAVAQSSINLYTSAILLEALLLPPRAFOQWRDAMDQNSADSCERYSYIQGHEKVFYFRVAVPPELGLKPLGSRERKRRQGGV 706  
 Flppc (WP\_003189102.1) FGLPDIIEQNLNLYLAAVLEALLLPPREFEPAWRHMLMDELADGVRVRAVAVRENGQVVEYFRQSPPEQELGRLPLGSRERKRRR-AGGI 710

Hppcc ETLRAIPWIFRWTOQLRMLPAWLGSGEFSRRLEQFGRDVLQEMRNEWPFPGVLMEMMLAKADVALAAVYHRVLDVESKRALCK 798  
 Cappc ETLRAIPWIFRWTOQLRMLPAWLGSGEFATRMOEGLVLRMNNWPFPGVLMEMMLKADISTAAVYHRVLDVESKRALCK 798  
 Oस्पcc (WP\_019935846.1) ESLRAIPWIFRWTOQLRMLPAWLGAHGLEKVA-D-CHEATLHAMNCGWPFRRARLLEEMVFLKADIGLAAVYHRVLDVESKRALCK 790  
 Mdppc (WP\_017223576.1) ESLRAIPWIFRWTOQLRMLPAWLGCATLAKNMLD-SQORTLEMOQGWPFRRARLLEEMVFLKADAWLAAVYDQCLVT-EDLHNLCK 793  
 Flppc (WP\_003189102.1) ESLRAIPWIFRWTOQLRMLPAWLGWAAVLSKALBRGEG-QILGVRREGWPFRRARLLEEMVFLKADADLAAVYDRDVEV-DPLTALCA 797

Hppcc QLRQRFASLEAVLDLQEKLEENLELIRGALHDVNRNYHDPLHGLQAEILLQNRDADGATASAEISRALMVTMAGISAGLRNRTG 882  
 Cappc SLRDRERLERLEKVLIRDQALREHMLELIRGALHDVNRNYHDPLHGLQAEILLQNRDADGATASAEISRALMVTMAGISAGLRNRTG 882  
 Oस्पcc (WP\_019935846.1) TLREDRASTELVKKKKSLEASLASEFWIQSISKLRNRYTDPNVLQAEILLKRSPE-QGDHVEVDQALMVTMAGISAGLRNRTG 873  
 Mdppc (WP\_017223576.1) ELRASALATELITGTPANLDGQVNSKTSLELRNRYTDPNVLQAEILLKRSPE-NEDNPDLEQALMVTMAGISAGLRNRTG 876  
 Flppc (WP\_003189102.1) HLRDLSEQACDVLWTCQSQVLAHSEDTLFRLELRNRYTDPNVLQAEILLKRSPEQQAQODSPLEQALMVTMAGISAGLRNRTG 881
